# Supplementary material for: New synthetic chitosan Schiff bases bearing pyranoquinolinone or benzonaphthyridine and their silver nanoparticles derivatives with potential activity as antioxidant and molecular docking study for EGFR inhibitors
Source: Royal Society of Chemistry journal article supplement (doi:10.1039/d4ra05117c), 2024-01-01
Supplement: d4ra05117c1.pdf [file d4ra05117c1.pdf]

## Supplemental Material

### New synthetic chitosan Schiff bases bearing pyranoquinolinone or benzonaphthyridine and their silver nanoparticles derivatives with potential activity as antioxidant and molecular docking study for EGFR inhibitors

Shrouk M. Hassan,<sup>a</sup> Jehan M. Morsy,<sup>a</sup> Hany M. Hassanin,<sup>a</sup> Elham S. Othman,<sup>a</sup> Mai A. Mostafa\*<sup>a</sup>

<sup>a</sup> Department of Chemistry, Faculty of Education, Ain Shams University, Roxy, 11711 Cairo, Egypt.

\*Email: [maiabdellatef@edu.asu.edu.eg](mailto:maiabdellatef@edu.asu.edu.eg)

### Analyses of compound 2

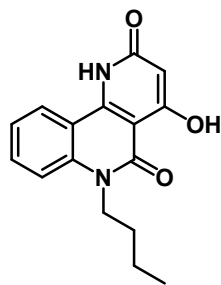

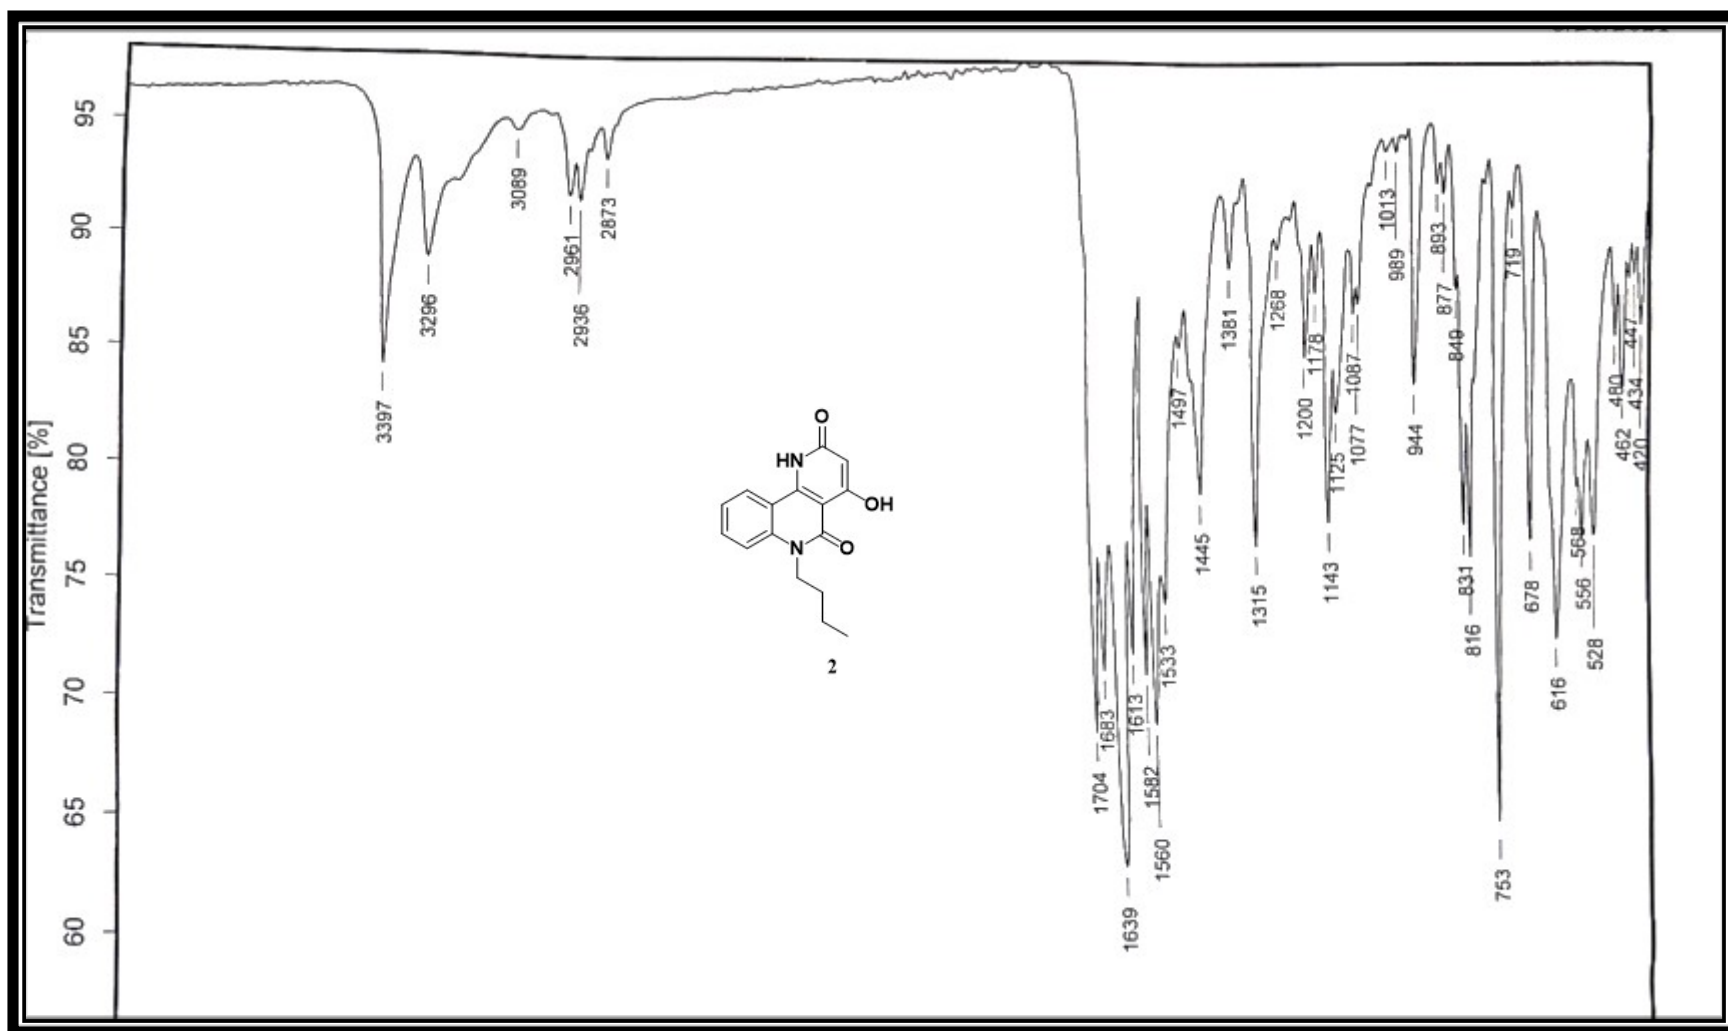

Figure S1: The IR spectrum of compound 2.

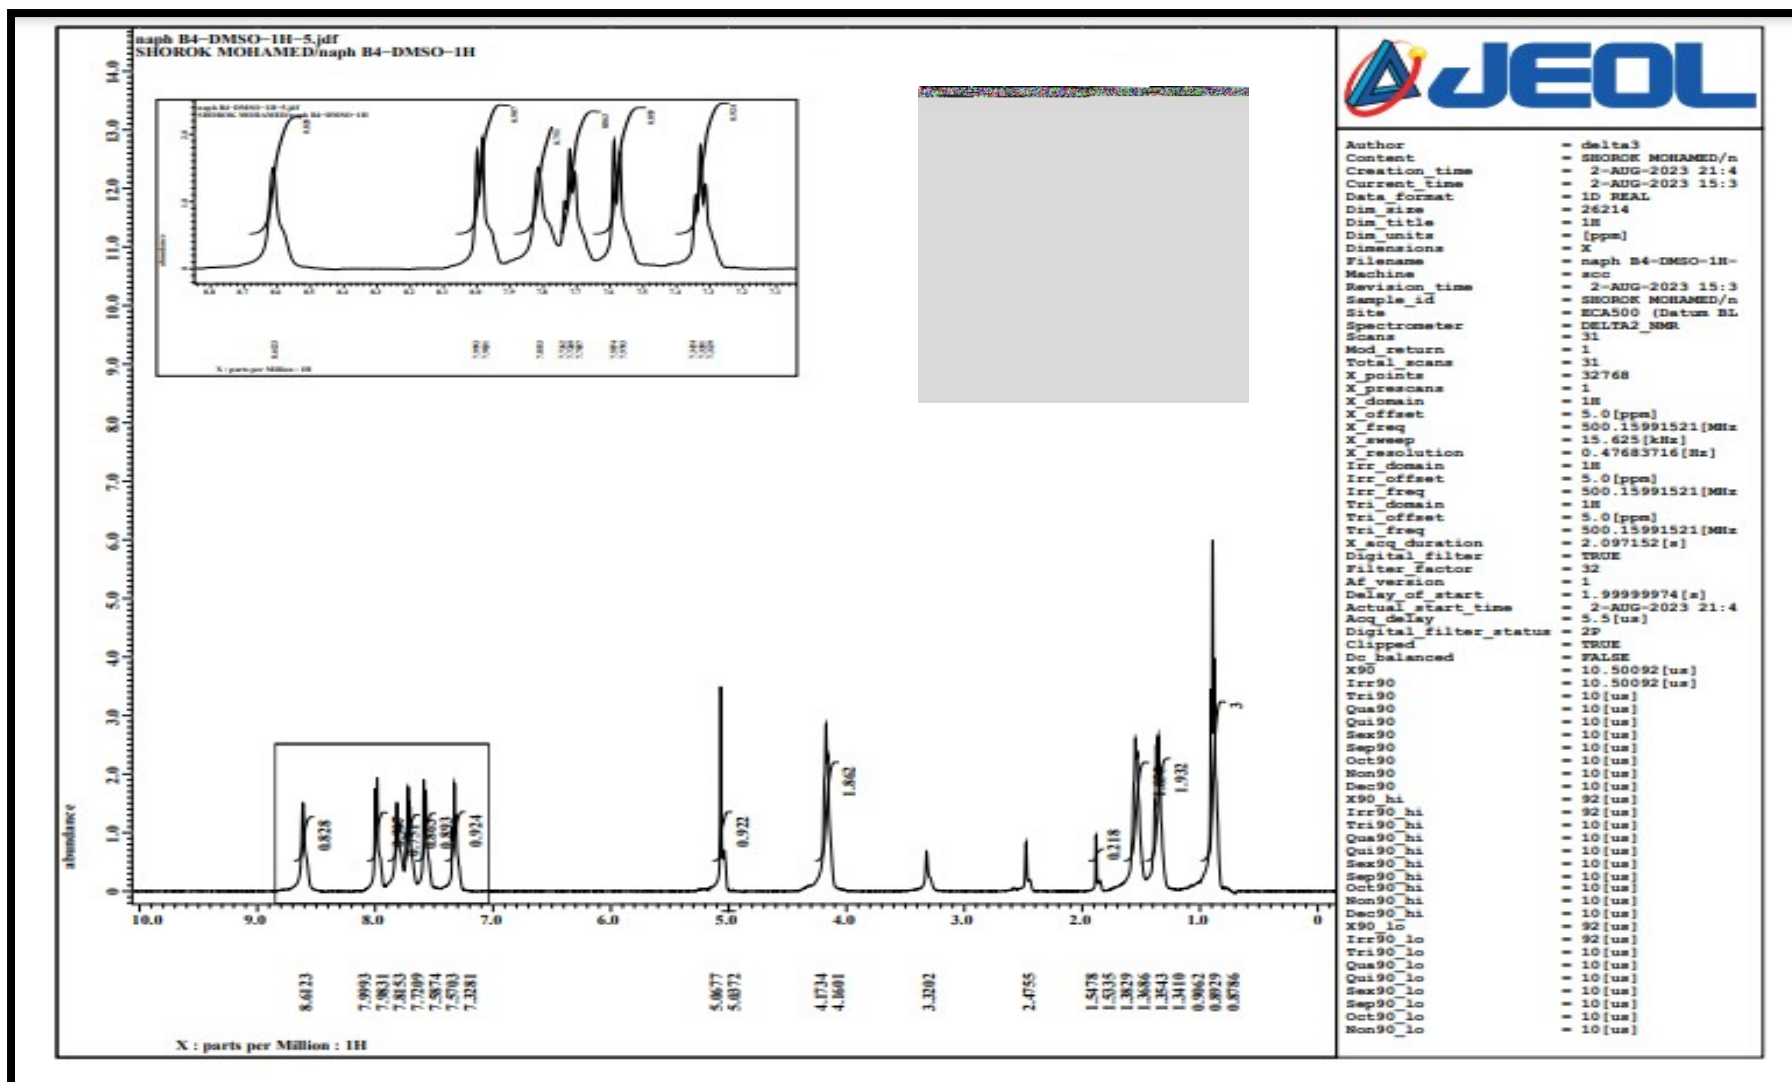

Figure S2: The  $^1\text{H}$ -NMR Spectrum of compound 2.

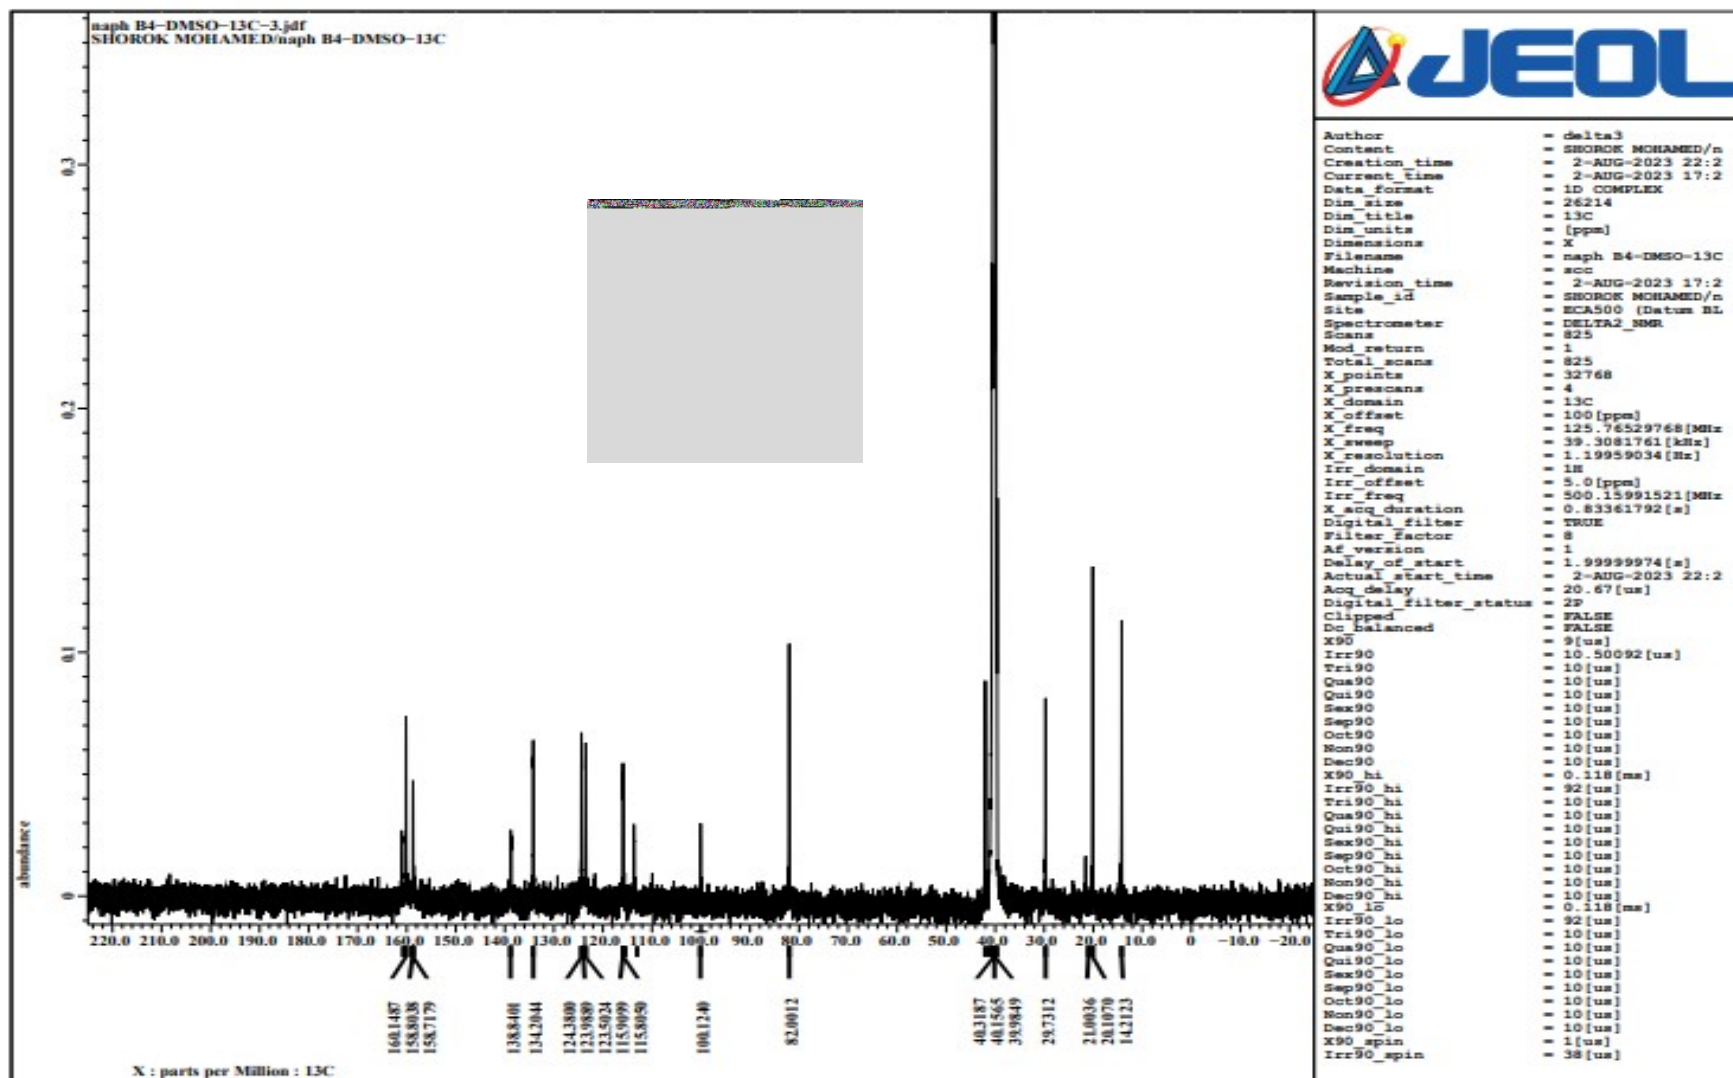

Figure S3: The  $^{13}\text{C}$ -NMR spectrum of compound 2.

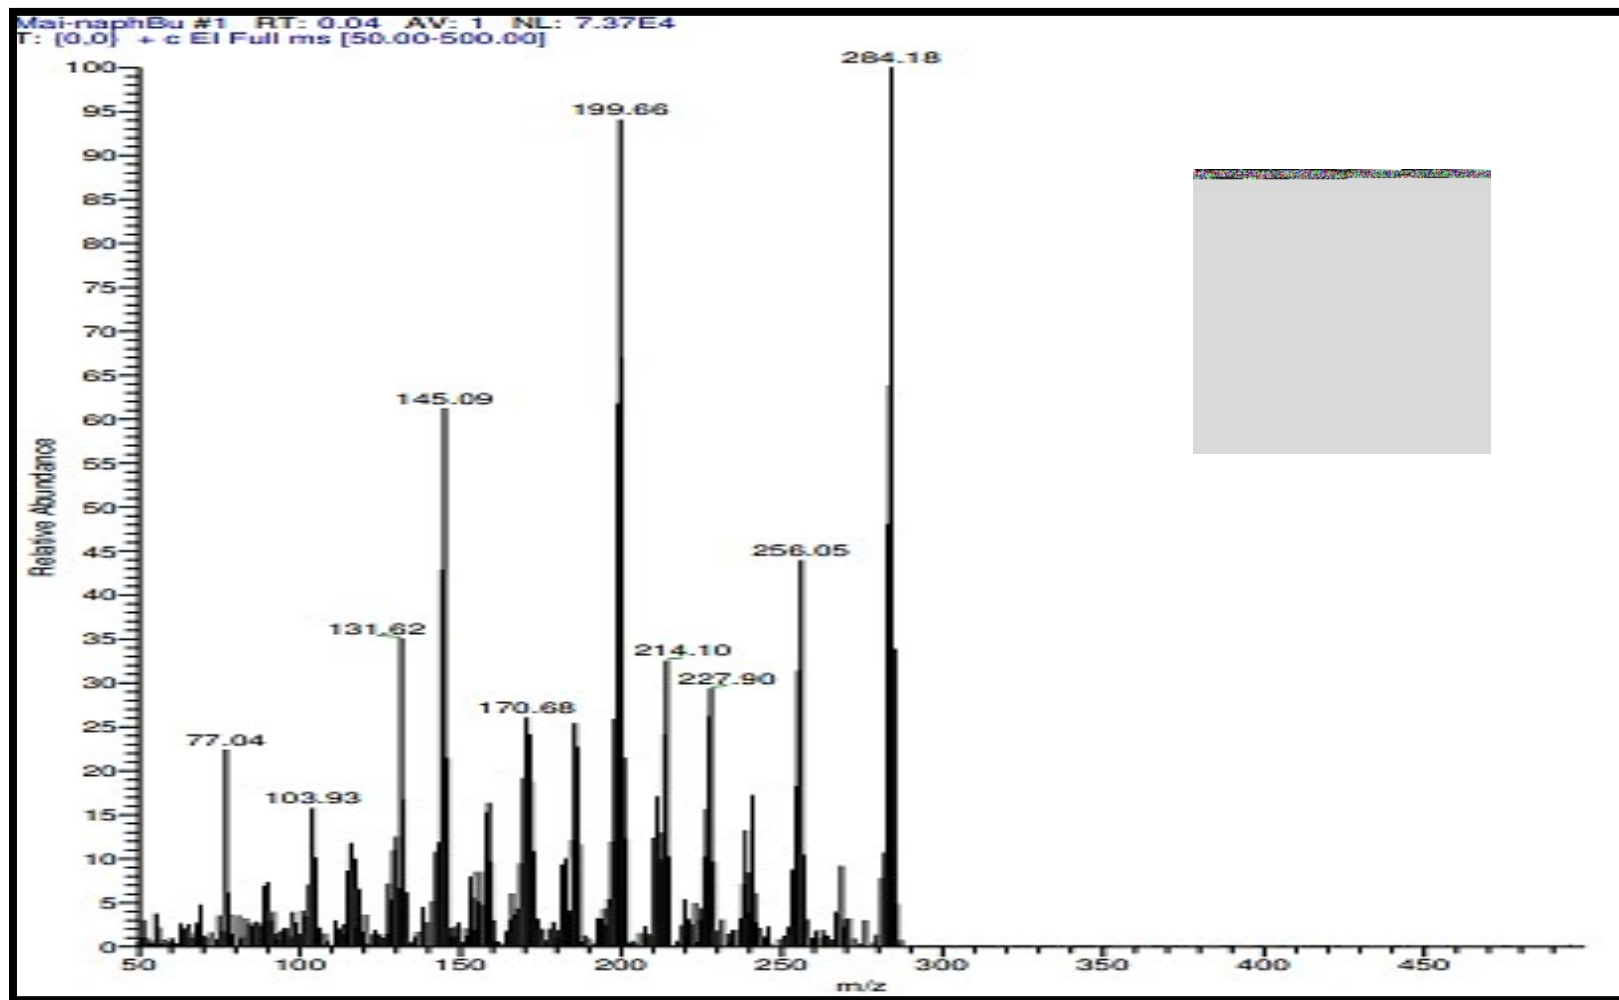

**Figure S4:** The mass spectrum of compound 2.

## Analyses of compound 3

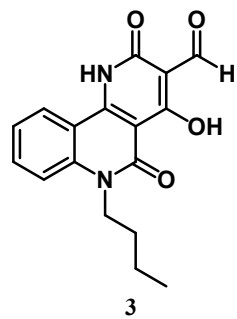

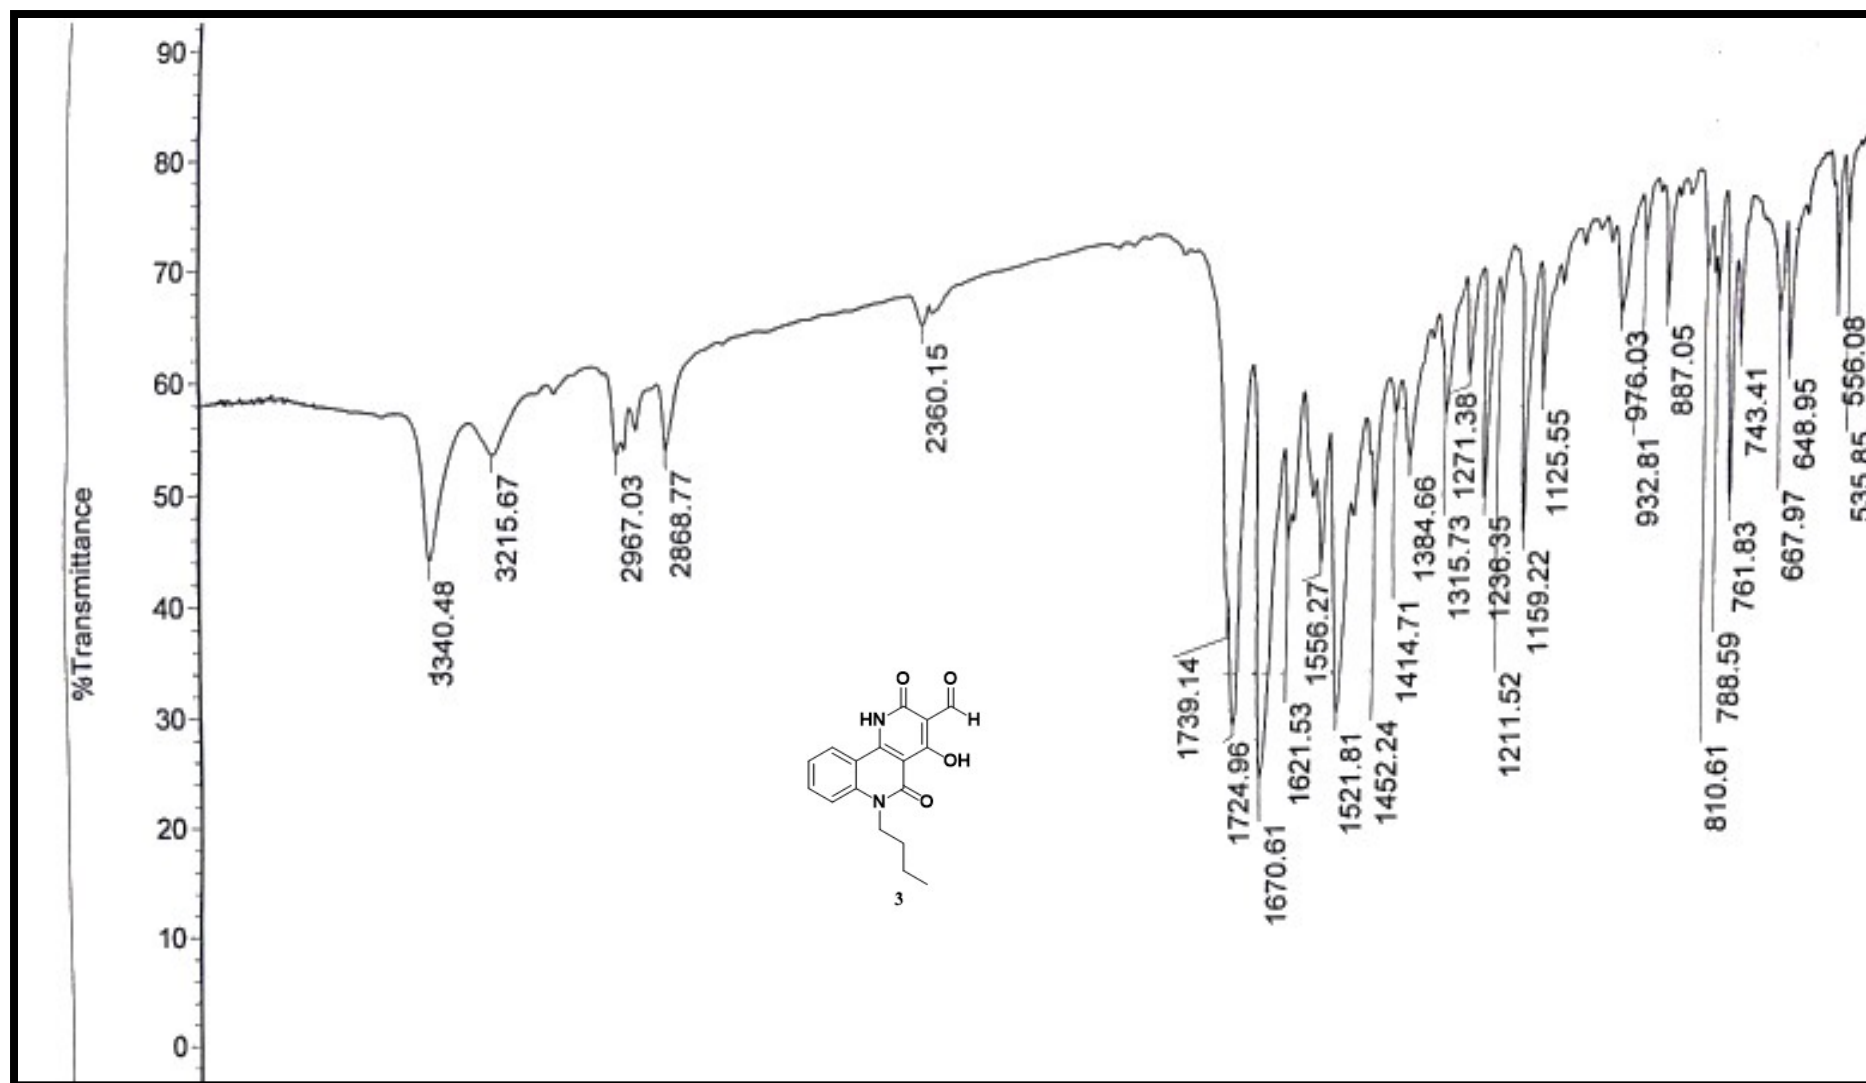

Figure S5: The IR spectrum of compound 3.

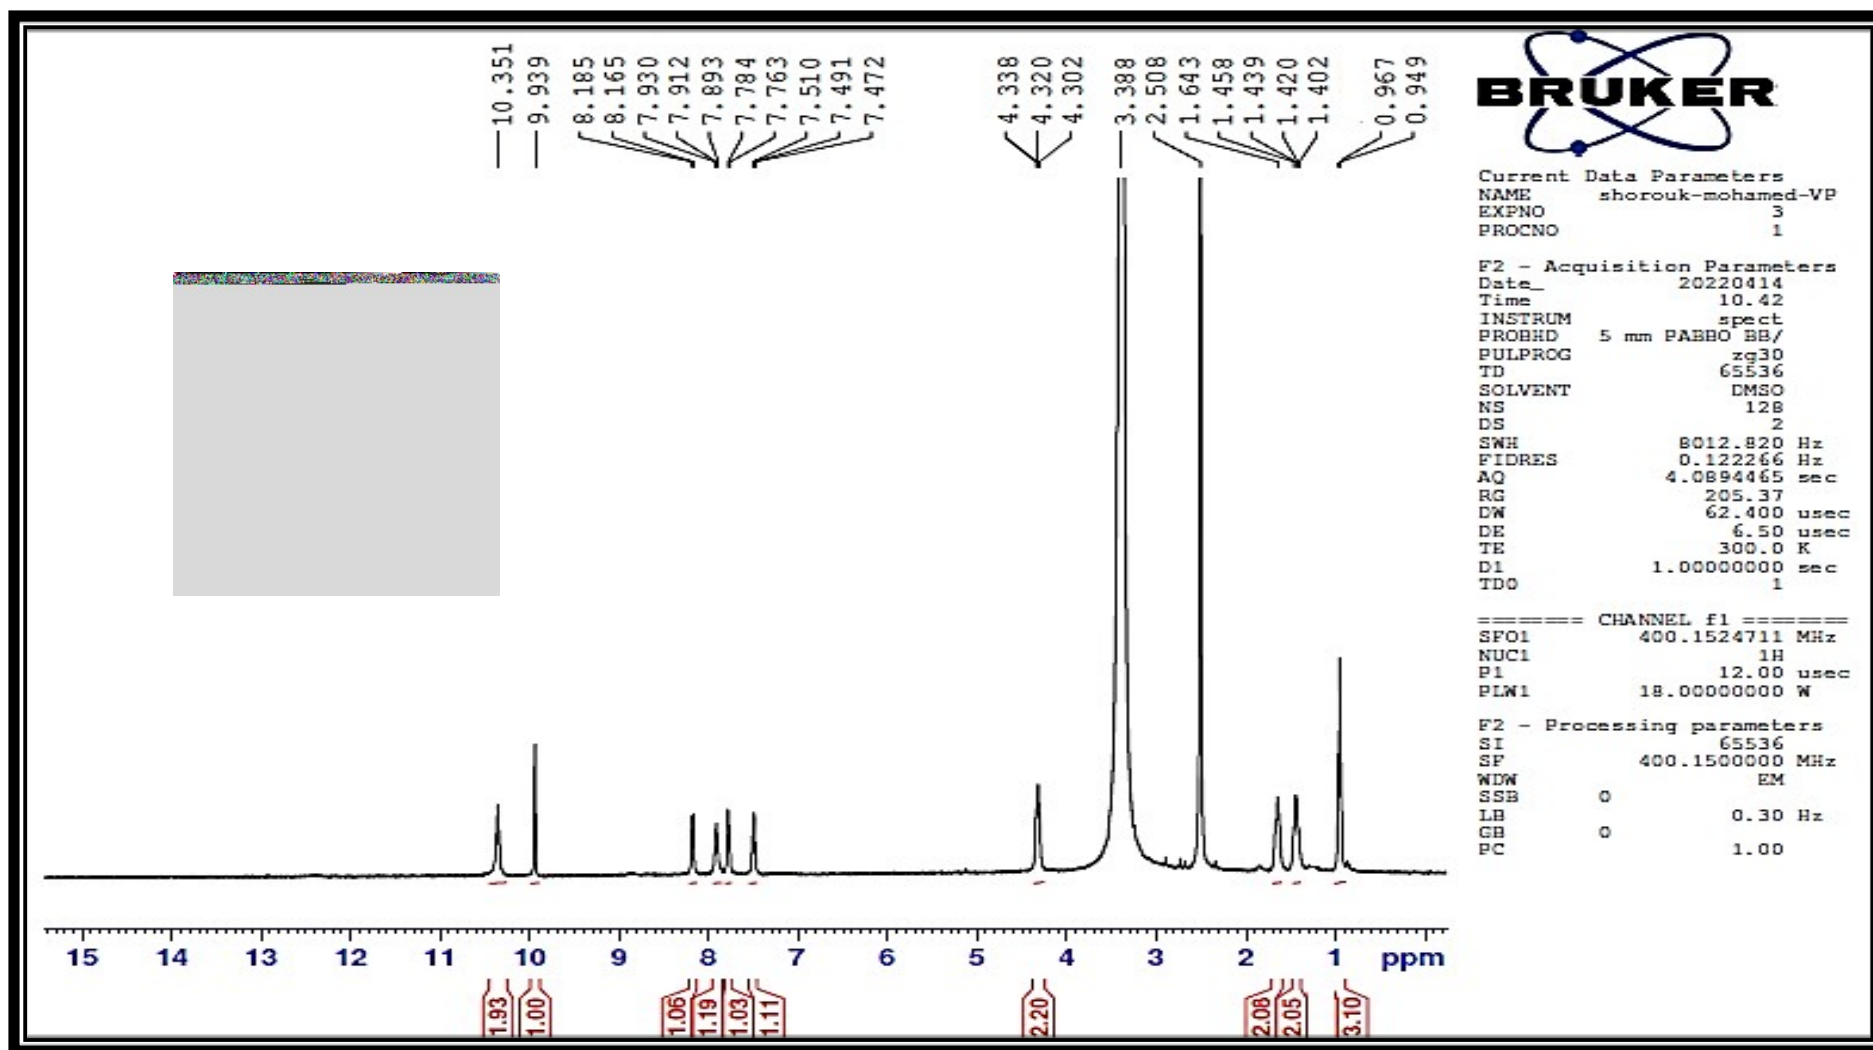

Figure S6: The <sup>1</sup>H-NMR Spectrum of compound 3.



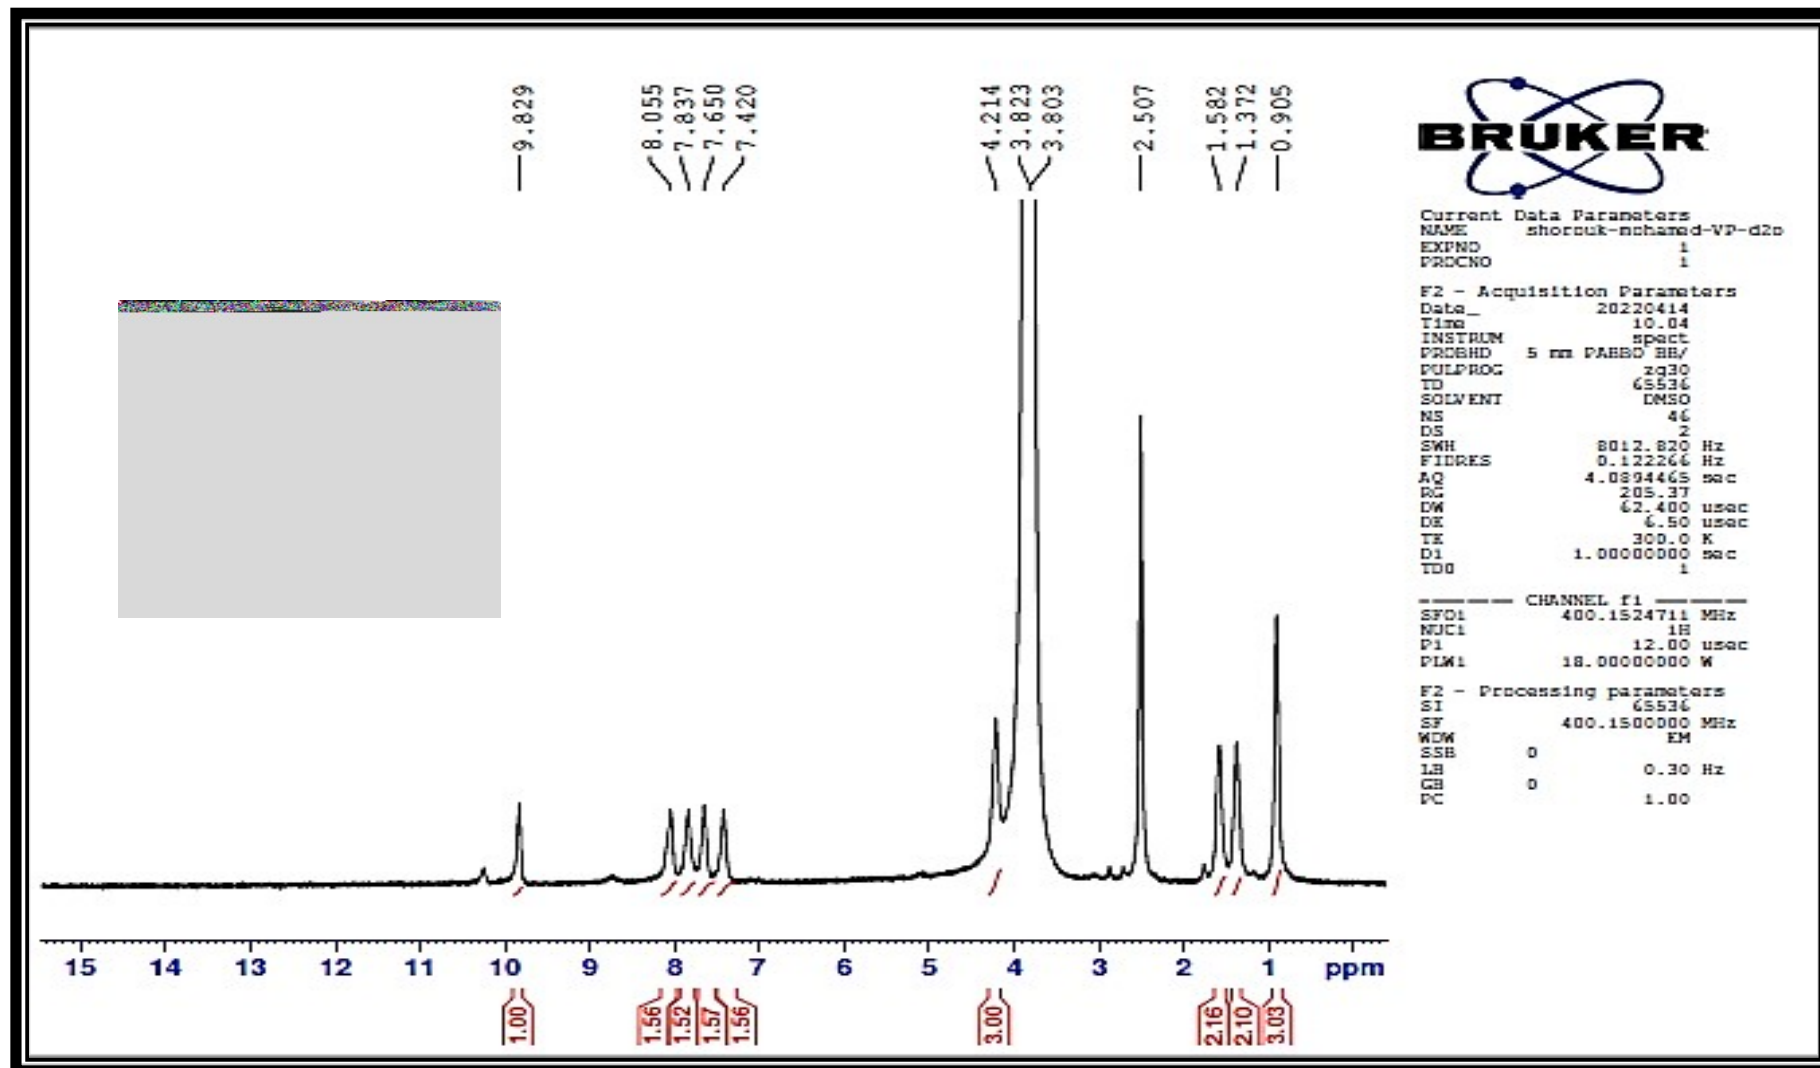

Figure S7: The D<sub>2</sub>O-<sup>1</sup>H NMR spectrum of compound 3.

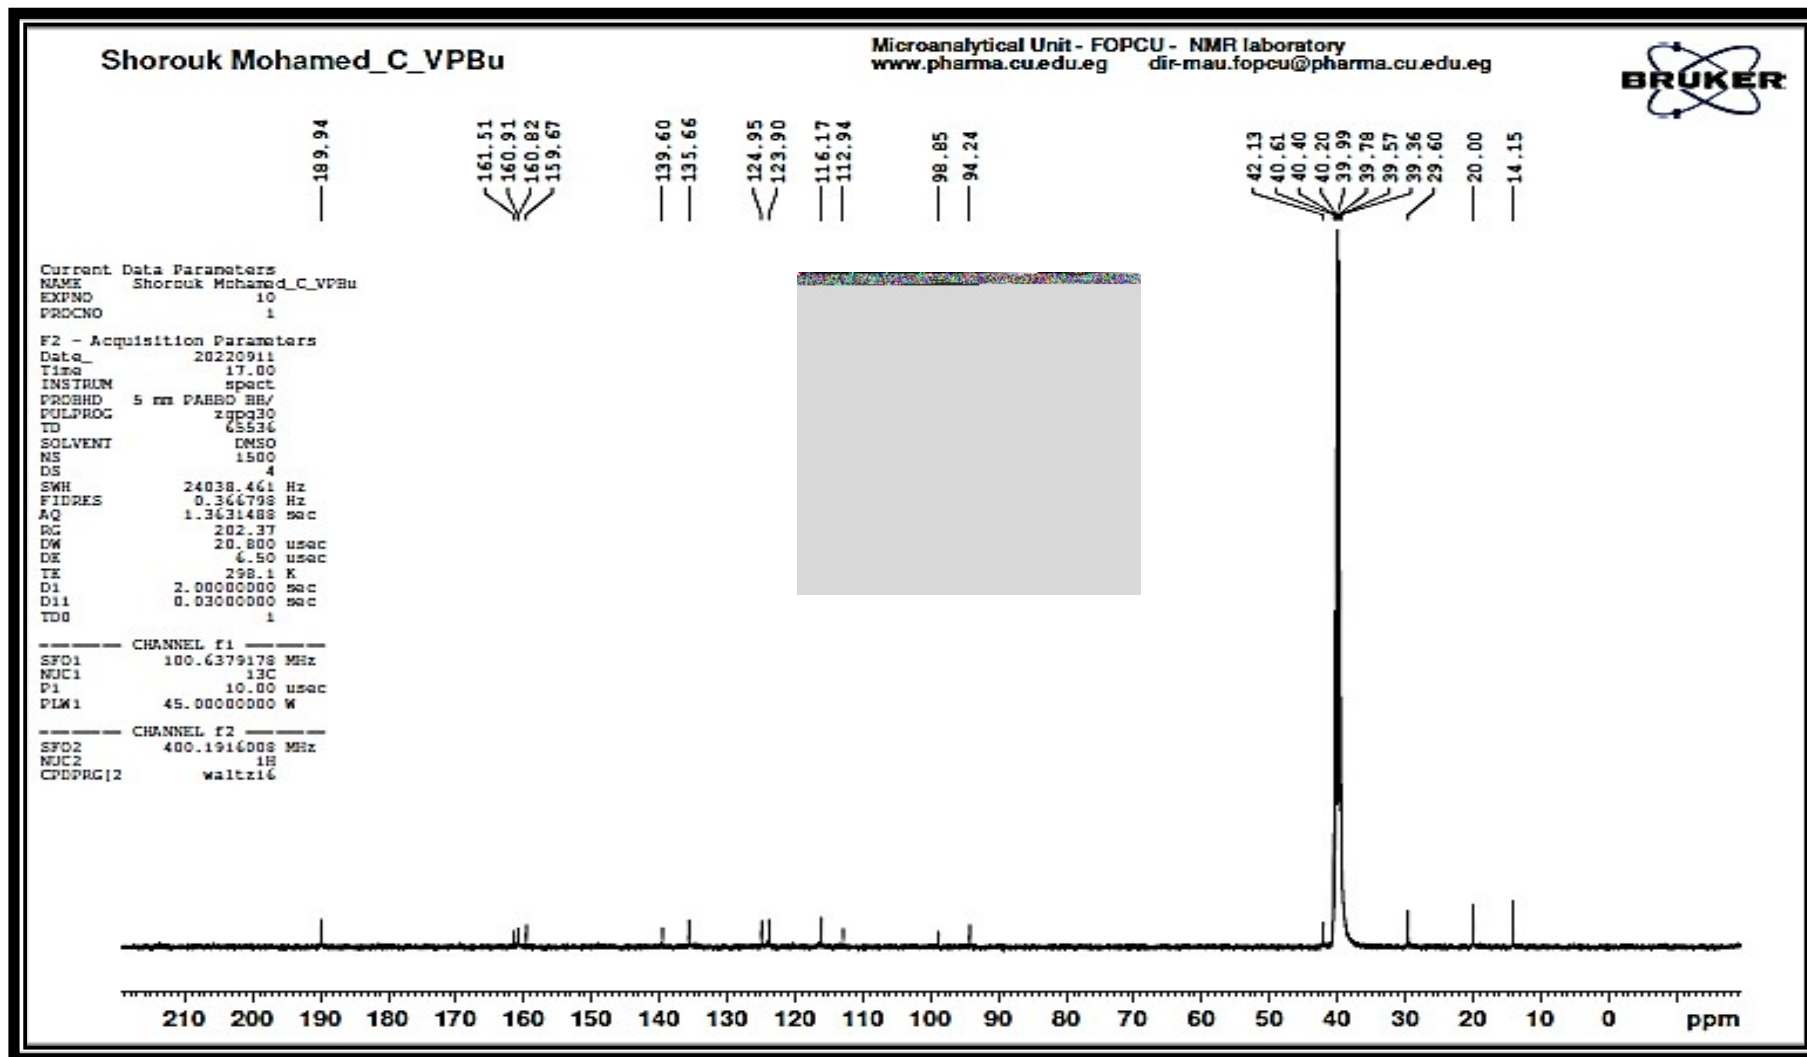

Figure S8: The  $^{13}\text{C}$ -NMR spectrum of compound 3.

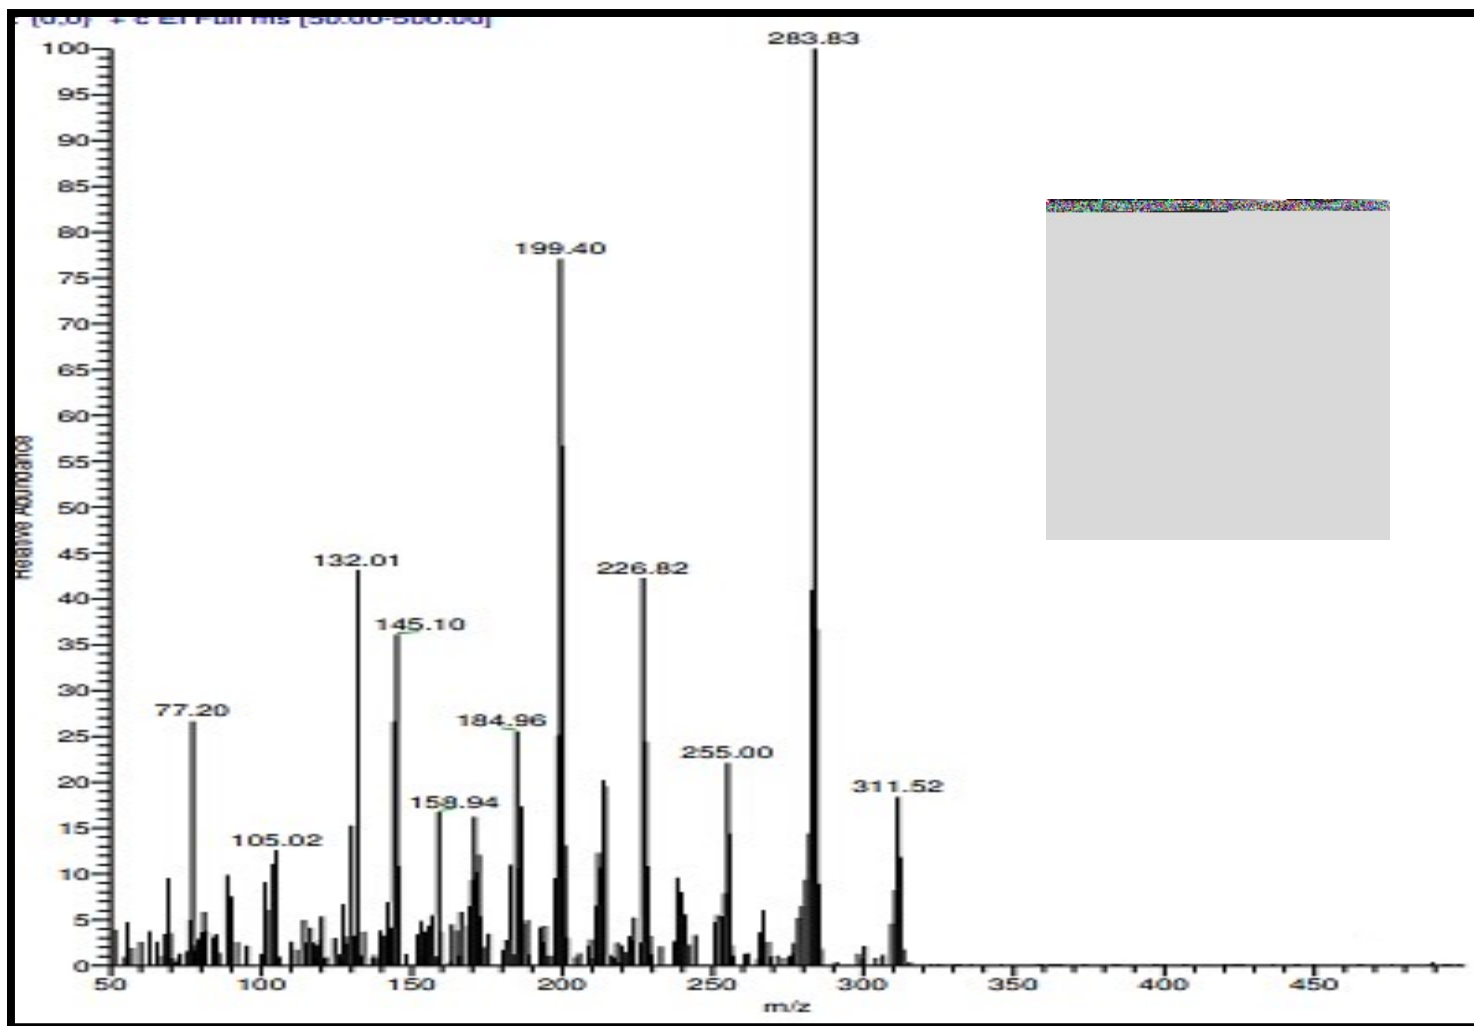

**Figure S9:** The mass spectrum of compound **3**.

## Analyses of compound 4

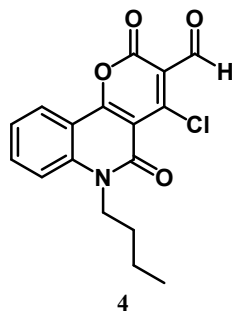

4

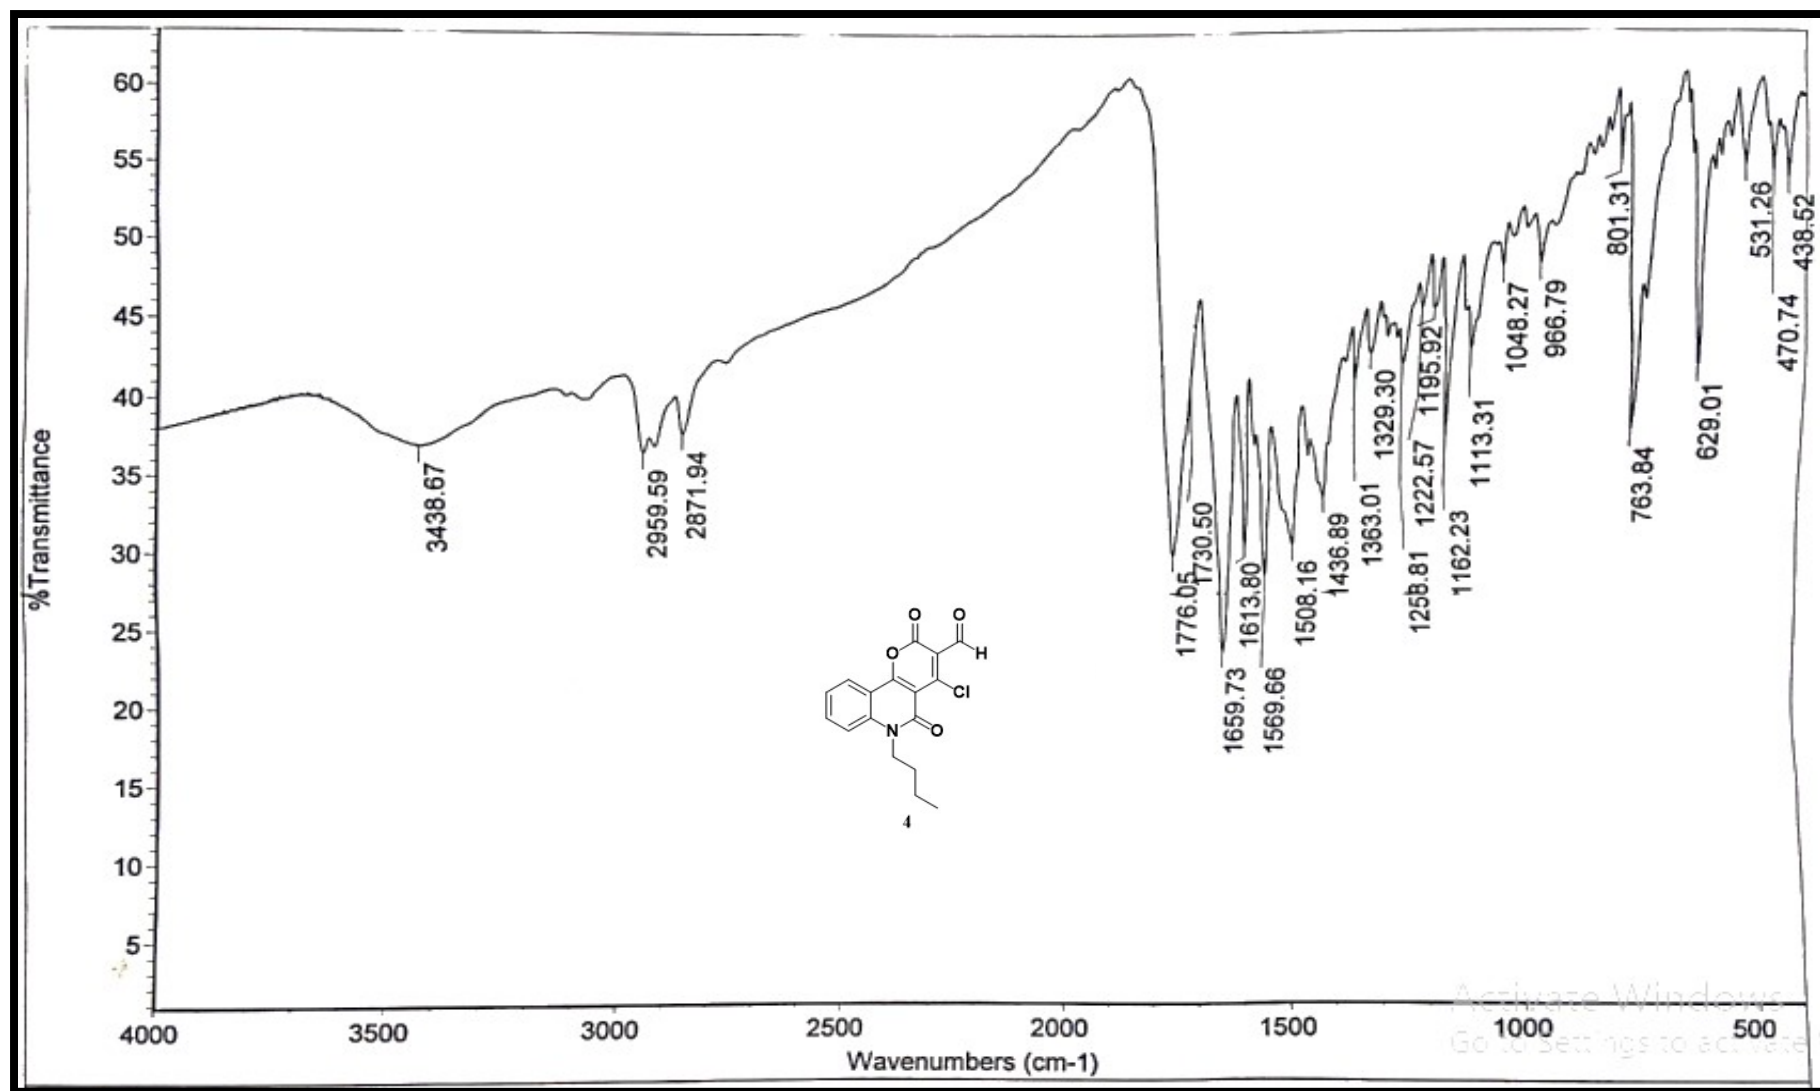

Figure S10: The IR spectrum of compound 4.

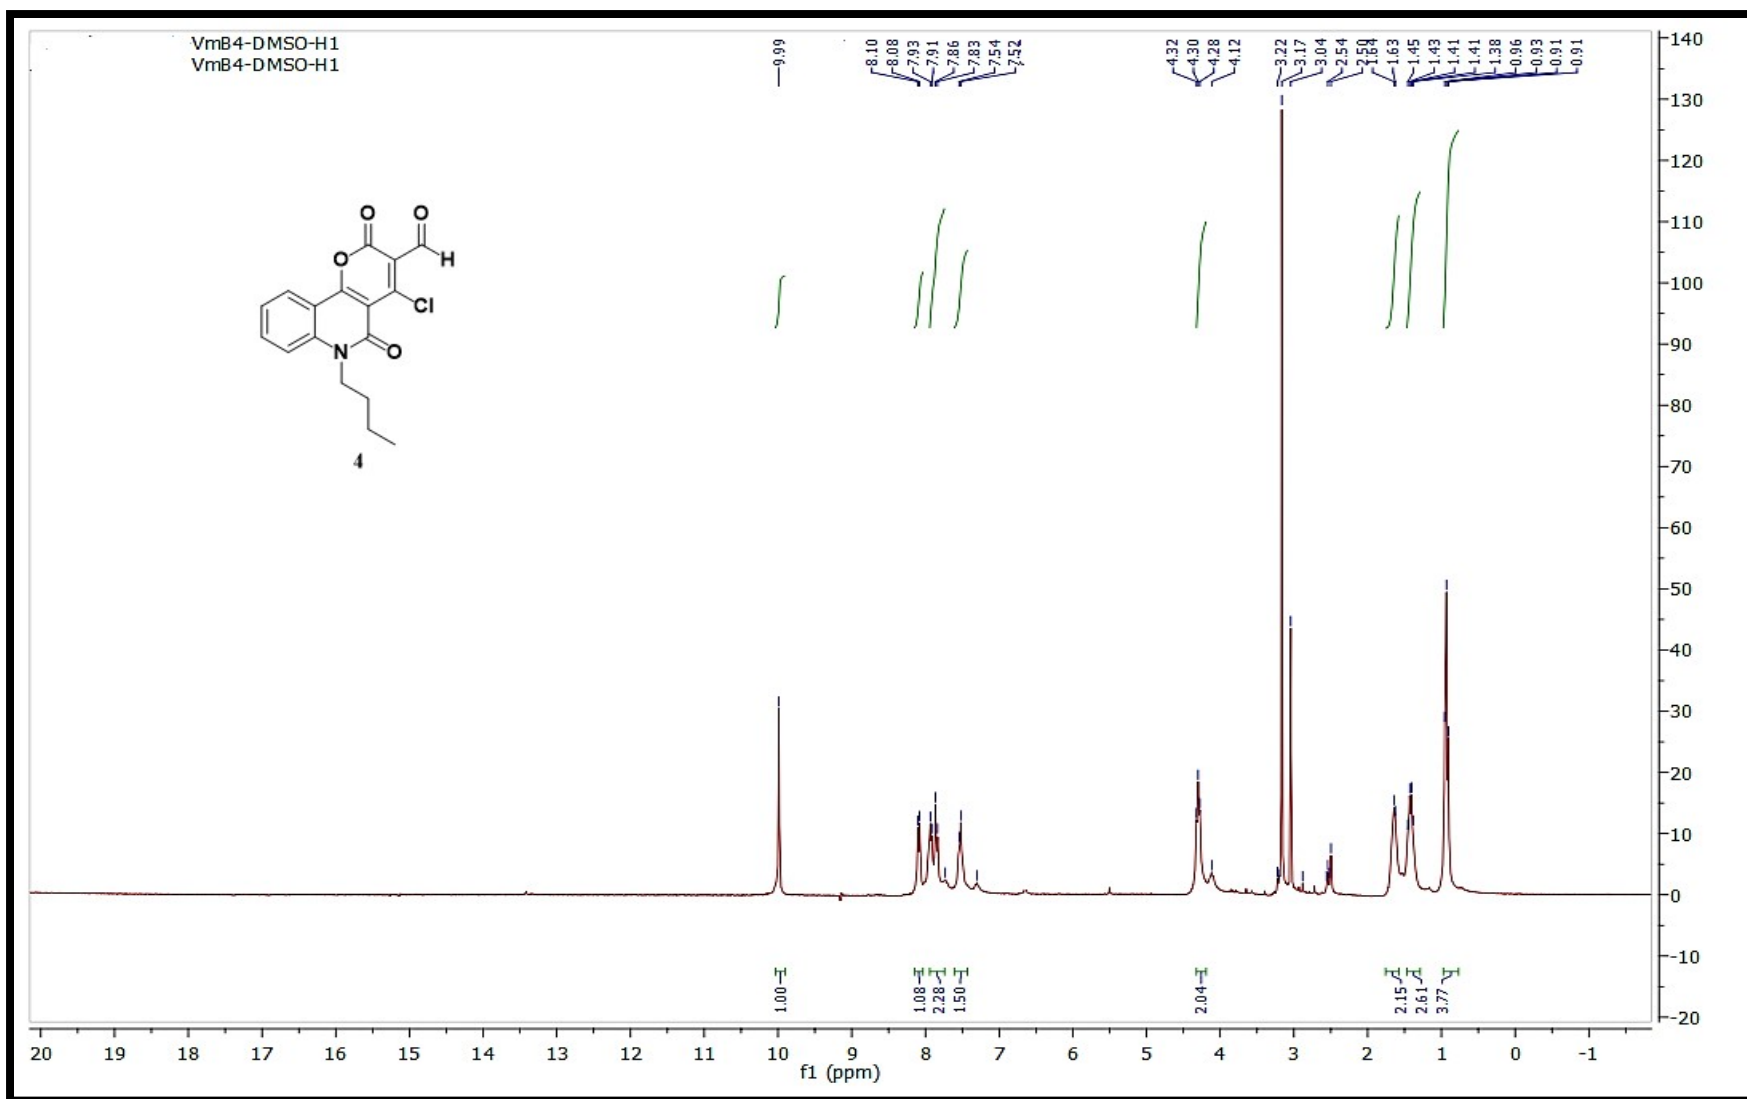

**Figure S11:** The  $^1\text{H}$ -NMR spectrum of compound **4**.

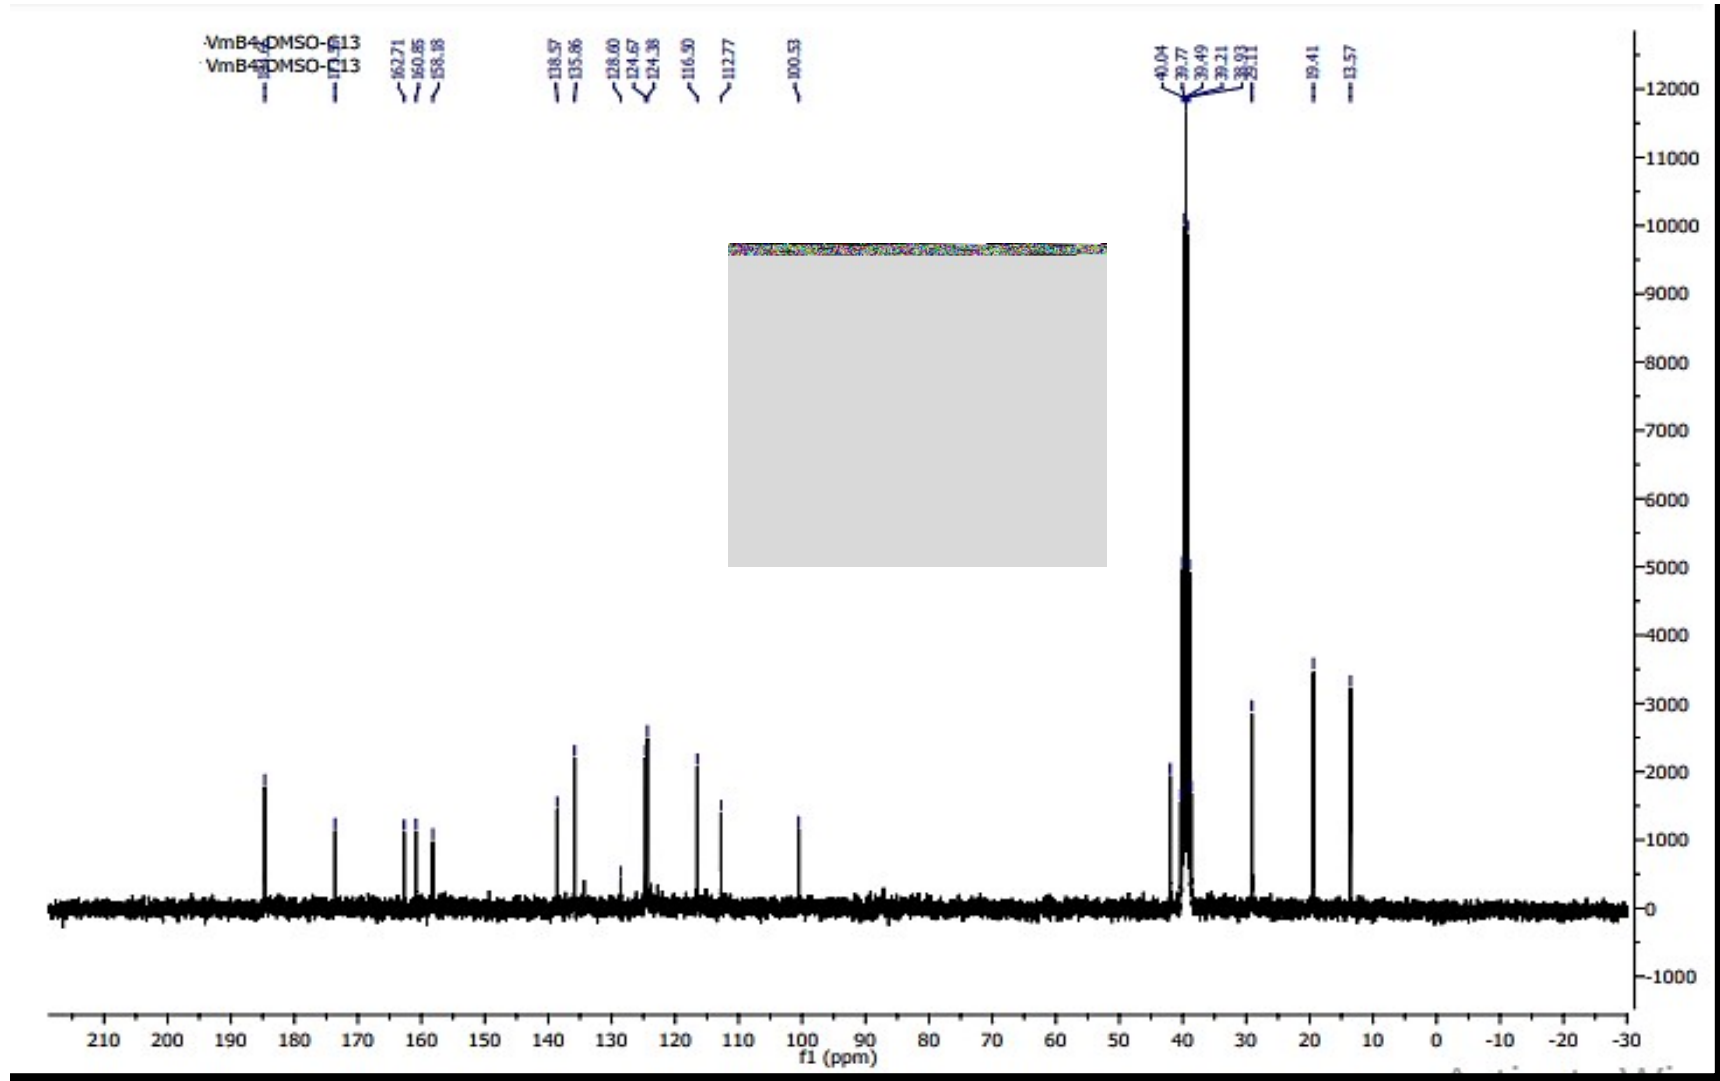

Figure S12: The  $^{13}\text{C}$ -NMR spectrum of compound 4.
